# Supplementary material
Source: Springer Nature journal article supplement (https://www.springermedizin.de/resource/supplementary/13049_2012_538_MOESM2_ESM.pdf/9666842)

Medikament: Hinweis:

- Clopidogrel/Iscover 75
- ASS 100
- Bisoprolol 5 mg
- Ramipril 5 mg
- Fluvastatin/Locol 80 mg
- Tamsulosin 0.4

OMEPRAZOL, 40.  
TILIDIN,

Handwritten medical notes on a grid background, including patient name and various medical details.

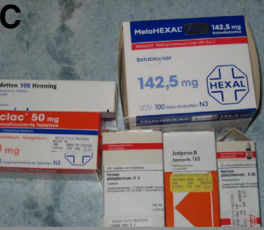

D

Vorläufiger Entlassungsbrief

Dr. Demuth 101-1212

Patient: [redacted]  
 Außenhaft: [redacted]  
 K-Kasse: [redacted]

Sehr geehrter Herr Kollege,

E

geb am [redacted] sich vom 25.11.2009 bis zum 12.12.2009 in [redacted] befand.

Diagnosen:  
 Kardiale Dekompensation bei Flüssigkeitsretention  
 V.a. Incompliance

- 1.) Z.n. Akutem Koronarsyndrom bei 3-Gefäßerkrankung 4
- 2.) 2-fach ACB 1994 (Vene auf RCA und IMA auf RIVA)
- Hinterwandinfarkt 1994
- Rassektion akuter Myokardinfarkt
- HK 23.4.09: Offener IMA auf RIVA, verschlossener Bypass hochgradige RCX-Stenose im mittleren Segment, Verschluss R.marginalis und der proximalen RCA
- leicht eingeschränkte LV-Funktion bei Akinesie des Apex
- 2.) Z.n. DDD-R-Schrittmachereimplantation 12/97 bei Tachybradykardiesyndrom mit Pausen bis zu 4,3s
- Sonderreversion bei Exitblock des Herzschrittmachers 4/0
- Aggregatwechsel wegen Batteriverschöpfung am 11/05
- 3.) Mitralsuffizienz I°, Trikuspidalsuffizienz I°
- 4.) Pulmonale Hypertonie
- 5.) COPD
- 6.) Niereninsuffizienz im Stadium der kompensierten Ret.
- 8.) Arterielle Hypertonie
- 9.) Nikotin (Ex)
- 10.) Hyperurikämie
- 11.) Arzneimittelabusus (Lexotani)

Dübelstomatikum Karche (DKA) Auflichtstrahlenspeiler: Verle...

F

| Medikamente                           | morgens | mittags | abends |
|---------------------------------------|---------|---------|--------|
| ASS 100 - IA PHARMA TAB 100 St        |         | 1       |        |
| CATAPRESAN 150 TAB 100 St             |         | 1       |        |
| LANTUS 100E/ML PATRONE ZYL ZAM 9X3 ml |         |         | 1      |
| MANINIL 1.75 TAB 120 St               | 1       |         |        |
| METO 200MG                            |         | 1       |        |
| OMEPRAZOL BIOMO 20MG KAPS KMR 30 St   | 1       |         |        |
| PRAVABETA 20MG TAB 100 St             |         |         | 1      |
| RAMIPRIL TAD 5MG TABL TAB 100 St      | 1       |         |        |
| TAMSU-ASTELLAS 0.4MG REK 100 St       | 1       |         |        |
| ALLOPURINOL AL 300 TAB 100 St         |         |         | 1      |

G

wir berichten über Ihre Patienten [redacted] verhehrt in [redacted] die sich im genannten Zeitraum in unserer stationären Behandlung befand.

Diagnosen:  
 - Transitorische ischämische Attacke im vertebrobasilären Strömgebiet  
 - Arterielle Hypertonie  
 - Herzinsuffizienz  
 - KHK  
 - Z.n. Schrittmachereanlage

Therapieempfehlung:  
 - Clopidogrel 75mg/200mg 1-0-1  
 - Lantus 0.1mg 0-0-1  
 - Omeprazol 20mg 0-0-1  
 - Rapendol 0.5mg 1-0-0  
 - Thyronin 50 µg 1-0-0

Epikrise:  
 Grund der stationären Aufnahme war eine plötzlich aufgetretene Gangunsicherheit mit Fußparalyse nach links.  
 Im neurologischen Untersuchungsbeund zeigte sich zum Aufnahmezeitpunkt kein Defizit mehr. Im CCT ergab sich kein Anhalt für einen frischen Infarkt. Eine Duplexsonografie der Hirnversorgenden Gefäße kühen wir in Anbetracht des Alters der Patienten bei fehlender bei repetitiver Konsequenz nicht durch.

An [redacted] erfolgte die Entlassung in Ihre hausärztliche Weiterbetreuung.

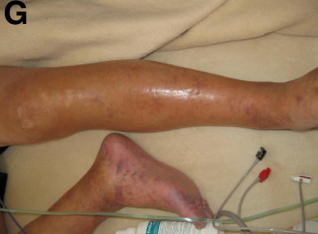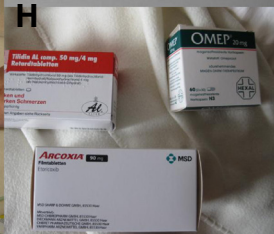

Supplement: MOESM2 [file 9666842]
